# Supplementary material
Source: publisher site journal article supplement (https://www.spandidos-publications.com/5207/downloadSupplementary)

Figure S1. Dose-response curves of chemotherapy agents in the HCC-44 cell line in the absence or presence of the immune checkpoint inhibitors (48 h treatment). (A) Gemcitabine; (B) pemetrexed; (C) cisplatin; (D) etoposide; (E) vinorelbine; (F) docetaxel; (G) paclitaxel. Average normalized viability values  $\pm$  SEM are shown ( $n \geq 3$  for each dose-response curve). The data were fitted to the (A and B) biphasic function or (C-G) logarithmic dose-response function. In case of biphasic curves, only low-dose  $pIC_{50}$  values were compared to establish the potentiating or depotentiating effects of antibodies. M, molarity.

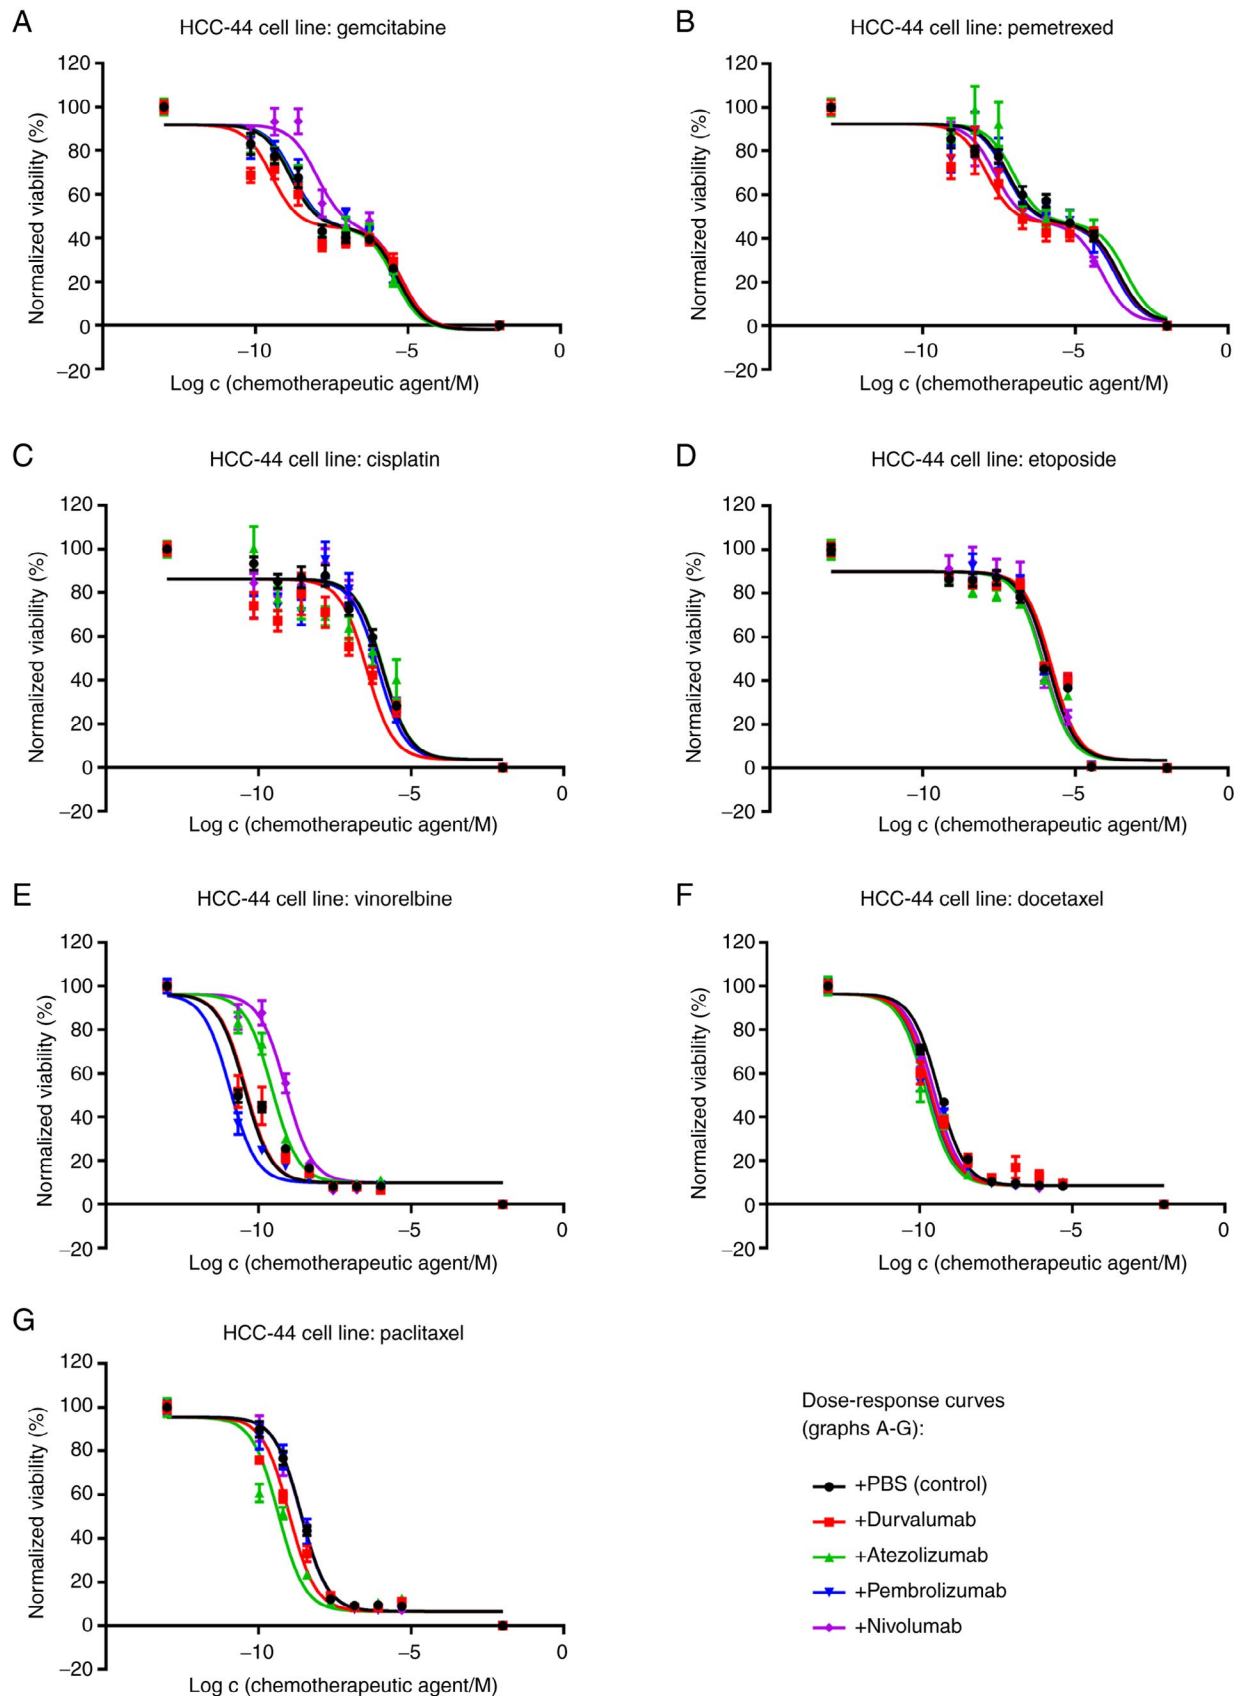

Figure S2. Dose-response curves of chemotherapy agents in the A-549 cell line in the absence or presence of the immune checkpoint inhibitors (48 h treatment). (A) Gemcitabine; (B) pemetrexed; (C) cisplatin; (D) etoposide; (E) vinorelbine; (F) docetaxel; (G) paclitaxel. Average normalized viability values  $\pm$  SEM are shown ( $n \geq 3$  for each dose-response curve). The data were fitted to the (A and B) biphasic function or (C-G) logarithmic dose-response function. In case of biphasic curves, only low-dose  $pIC_{50}$  values were compared to establish the potentiating or depotentiating effects of antibodies. M, molarity.

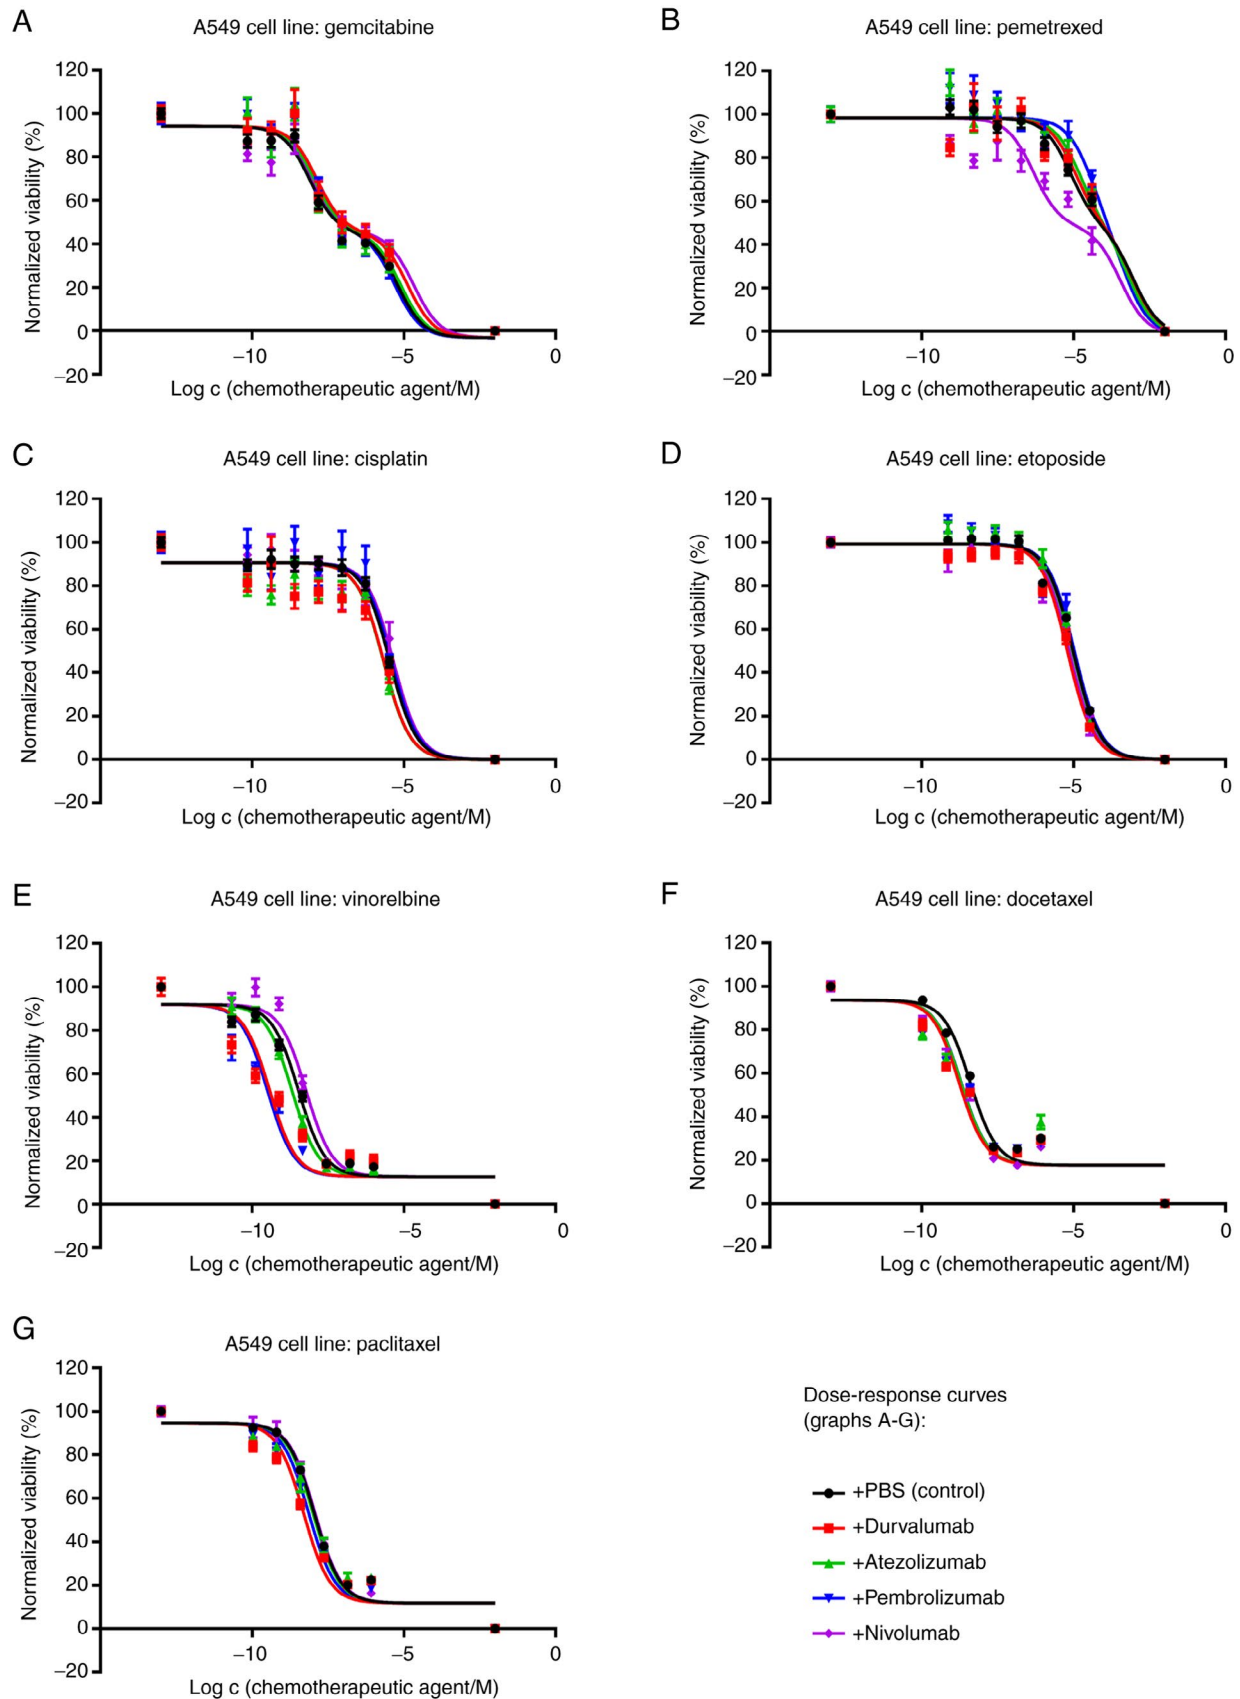

Figure S3. Microscopy images (20x objective) of the immunohistochemically stained (anti-PD-L1) paraffinized A549 cell line pellets. Treatments: (A) 48 h treatment with durvalumab (final concentration of 0.49 mg/ml); (B) 48 h treatment with cisplatin (1  $\mu$ M); (C) 48 h treatment with durvalumab and cisplatin mixture (concentrations as in A and B); (D) 48 h treatment with docetaxel (5 nM); (E) 48 h treatment with docetaxel and durvalumab (concentrations as in A and D). In each panel, a representative image from a single experiment is shown. Scale bar: 50  $\mu$ m.

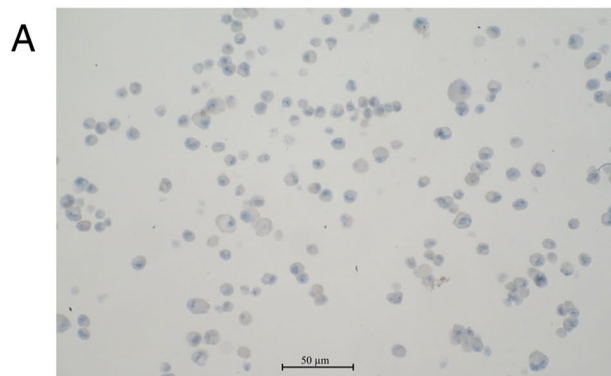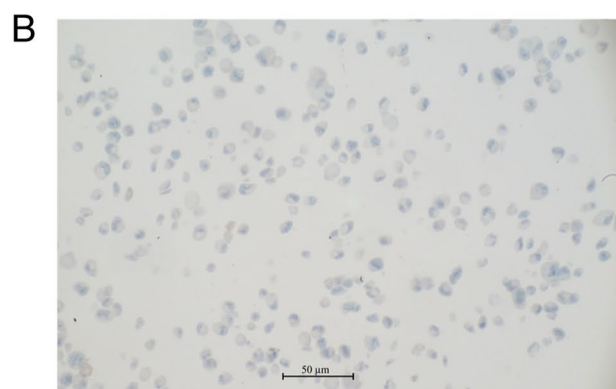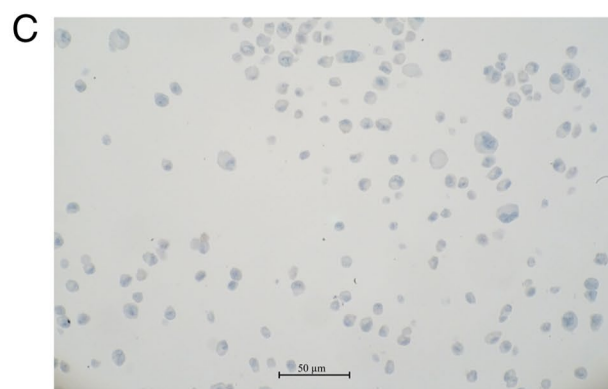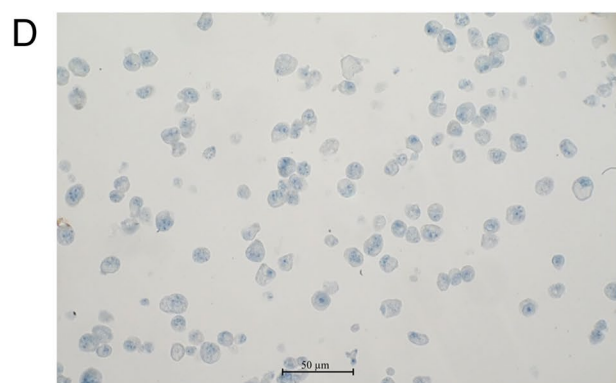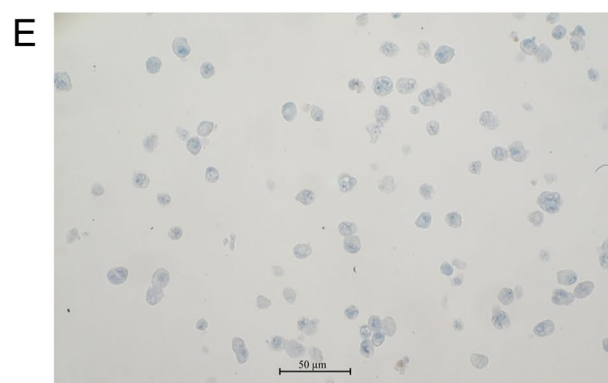

Figure S4. Microscopy images (20x objective) of the immunohistochemically stained (anti-PD-L1) paraffinized HCC-44 cell line pellets. Treatments: (A) 48 h treatment with durvalumab (final concentration of 0.49 mg/ml); (B) 48 h treatment with cisplatin (1  $\mu$ M); (C) 48 h treatment with durvalumab and cisplatin mixture (concentrations as in A and B); (D) 48 h treatment with docetaxel (5 nM); (E) 48 h treatment with docetaxel and durvalumab (concentrations as in A and D). In each panel, a representative image from a single experiment is shown. Scale bar: 50  $\mu$ m.

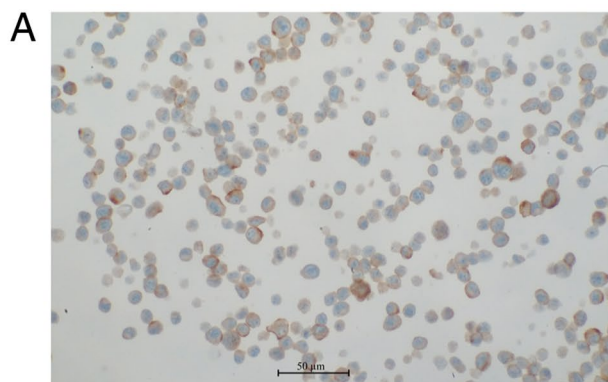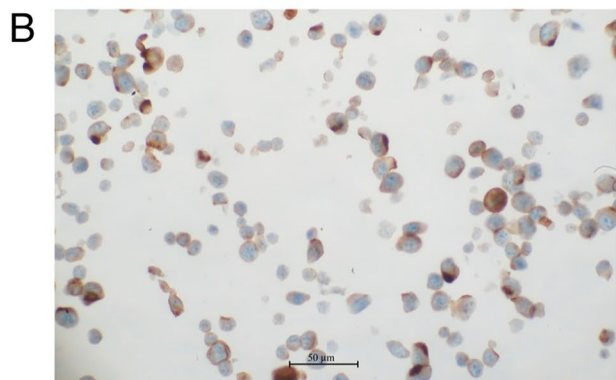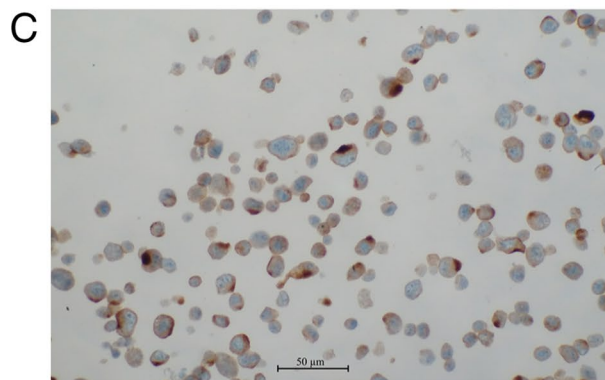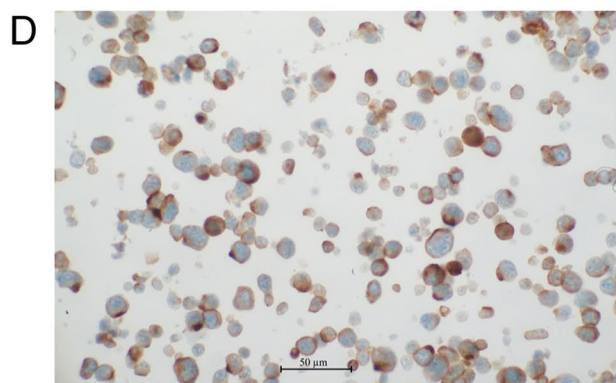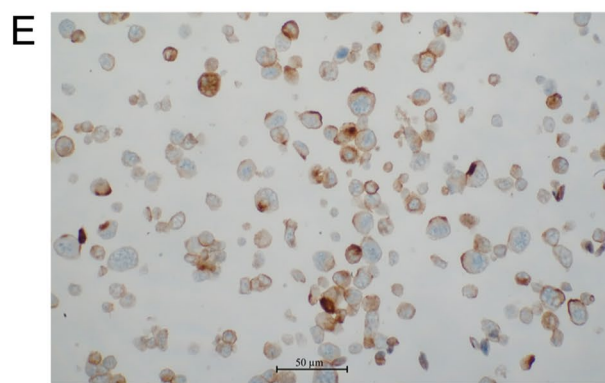



Figure S5. Scatter plots showing results of  $\gamma$ H2AX immunostaining in the HCC-44 cell line following treatment with different concentrations of chemotherapeutic agents or their mixtures with durvalumab (0.49 mg/ml). Treatments: (A) gemcitabine  $\pm$  D; (B) pemetrexed  $\pm$  D; (C) cisplatin  $\pm$  D; (D) docetaxel  $\pm$  D; (E) paclitaxel  $\pm$  D; (F) vinorelbine  $\pm$  D. Negative control (PBS) and durvalumab-only treatment are also shown in each graph. In graphs, each colored circle represents an individual nucleus; black line shows population median. The dashed frames show the treatments chosen for assessment of the durvalumab effect on chemotherapeutic agent. Each graph shows data from 3 independent experiments. D, durvalumab.

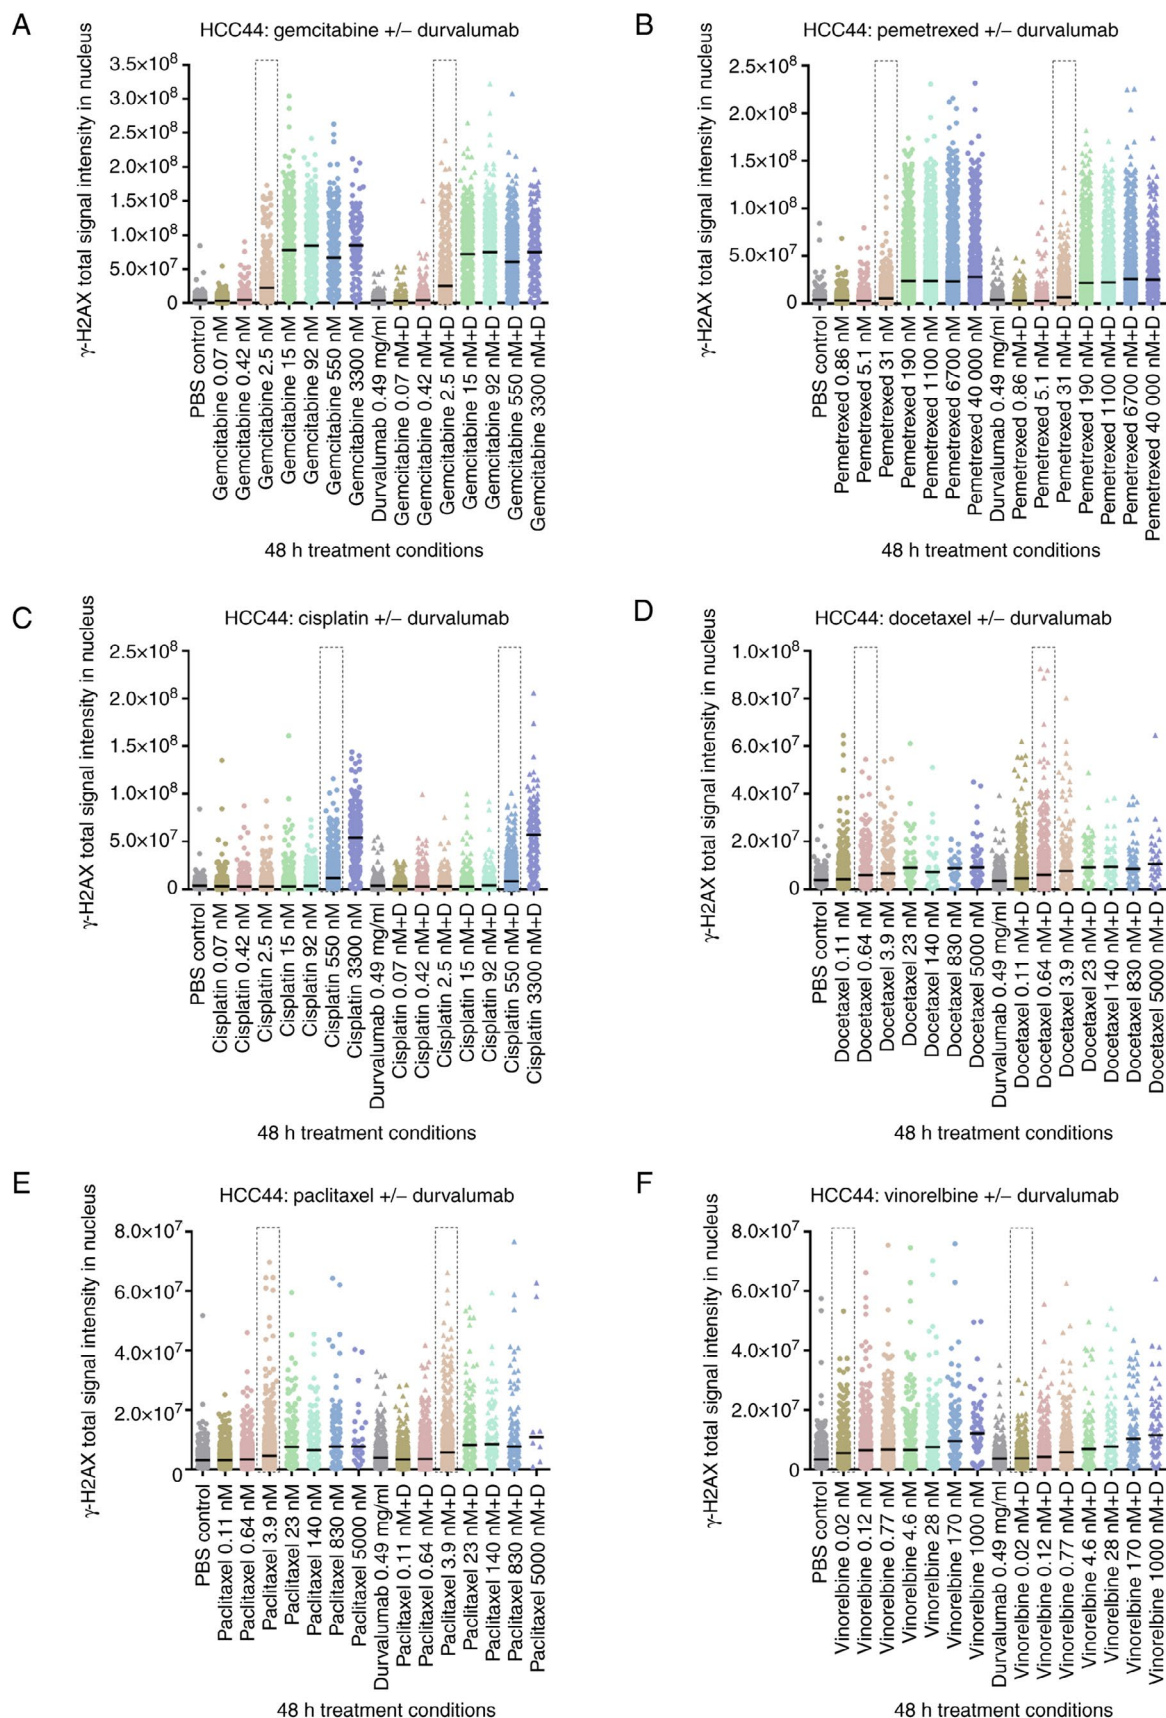

Figure S6. Scatter plots showing results of  $\gamma$ H2AX immunostaining in the A549 cell line following treatment with different concentrations of chemotherapeutic agents or their mixtures with durvalumab (0.49 mg/ml). Treatments: (A) gemcitabine  $\pm$  D; (B) pemetrexed  $\pm$  D; (C) cisplatin  $\pm$  D; (D) docetaxel  $\pm$  D; (E) paclitaxel  $\pm$  D; (F) vinorelbine  $\pm$  D. Negative control (PBS) and durvalumab-only treatment are also shown in each graph. In graphs, each colored circle represents an individual nucleus; black line shows population median. The dashed frames show the treatments chosen for assessment of the durvalumab effect on chemotherapeutic agent. Each graph shows data from 3 independent experiments. D, durvalumab.

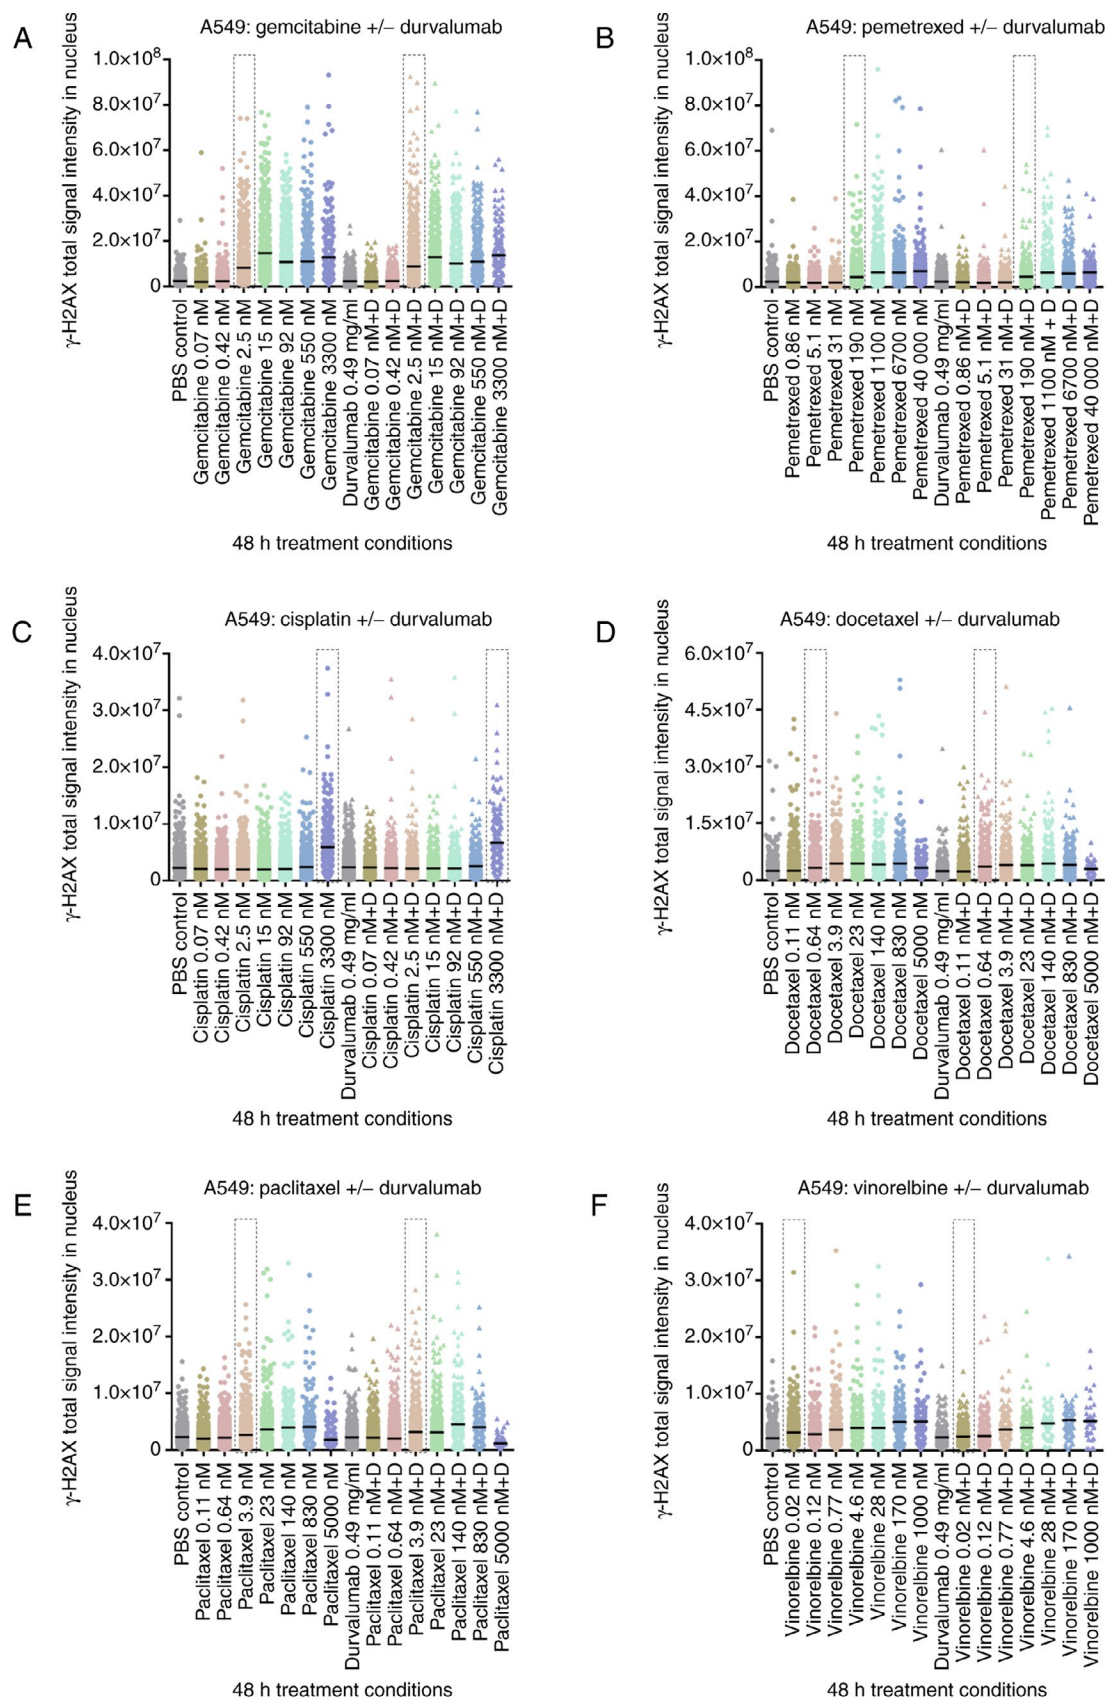

Figure S7. Example microscopy images in the HCC-44 cell line following treatment with the highest concentrations of three chemotherapeutic agents used in this study. Treatments: (A and B) negative control (PBS); (C and D) gemcitabine (3.3  $\mu$ M); (E and F) pemetrexed (40  $\mu$ M); (G and H) cisplatin (3.3  $\mu$ M). Optical channels: A, C, E and G-DNA staining in nuclei by DAPI (blue); B, D, F and H- $\gamma$ H2AX staining in nuclei by selective antibody and secondary antibody (conjugated with Alexa Fluor<sup>®</sup> 568; red). Scale bar: 50  $\mu$ m. The images show data from a single representative experiment. Note the significant extent of cellular death (the initial cell seeding density prior to treatment was equal for all conditions).

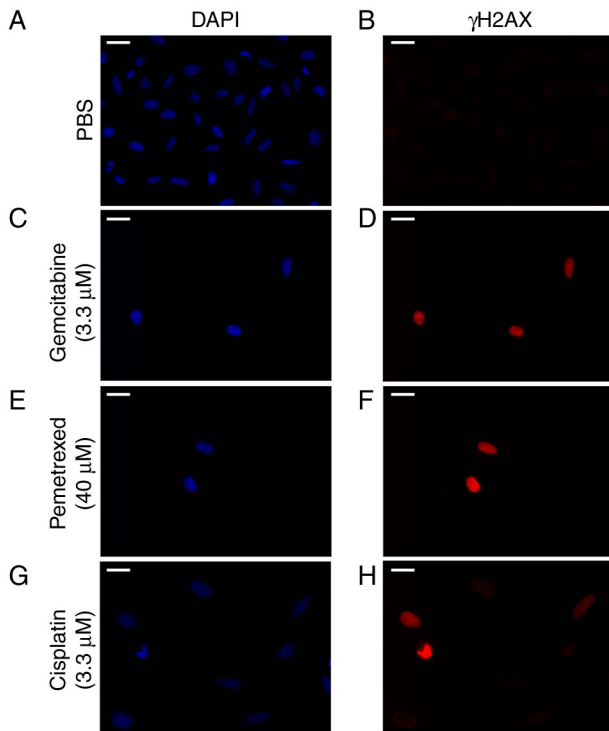

Supplement: Supplementary file 1 [file downloadSupplementary]
